# Supplementary material
Source: PubMed Central journal article supplement (PMC3957863)
Supplement: AAC.01746-13_zac003142644so1.pdf [file AAC.01746-13_zac003142644so1.pdf]

FIGURE S1

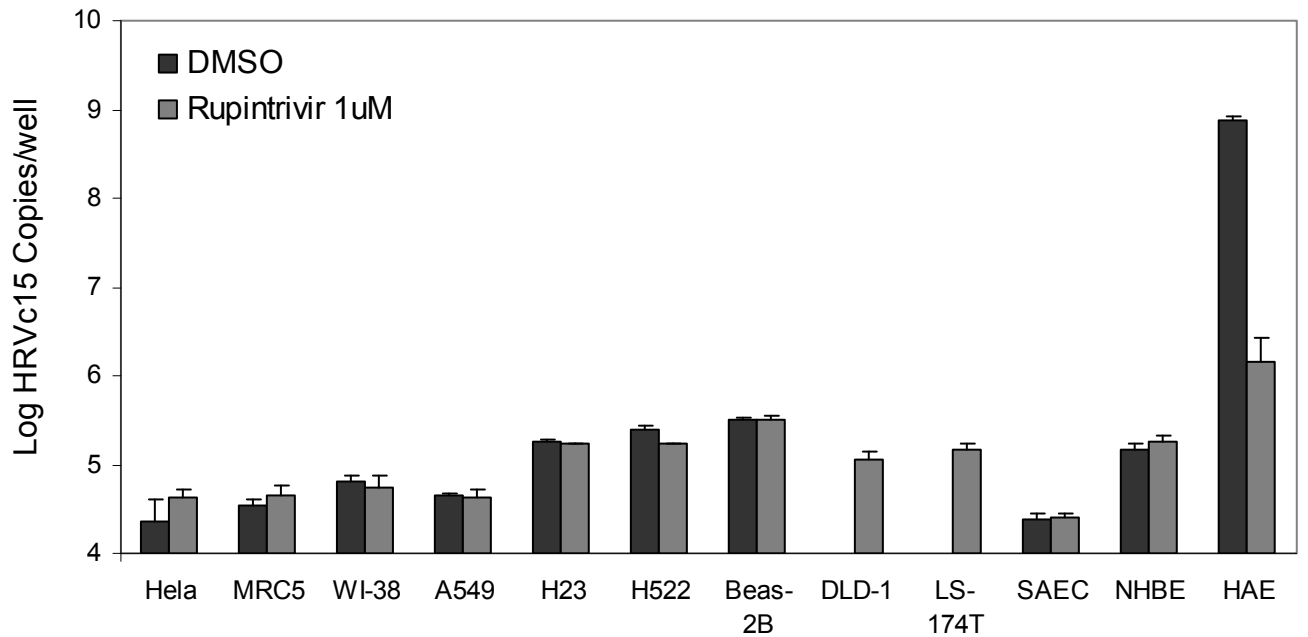

FIG S1. Permissivity of tested cell lines to HRVc15 virus infection. Selected transformed and primary respiratory cell lines were infected with HRVc15 virus ( $3.8 \times 10^7$  copies) in the presence of 0.5% DMSO or 1uM rupintrivir and incubated for 5-days at 33°C. Total viral RNA was isolated and analyzed by RT-qPCR. Error bars represent the standard deviation of the mean from triplicate tests.

FIGURE S2

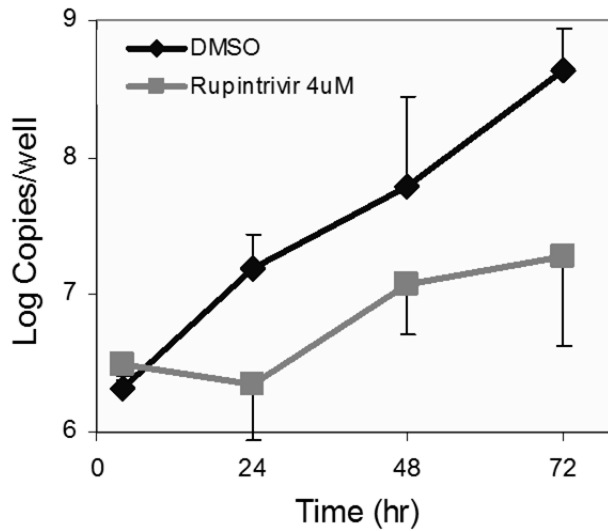

FIG S2. Serial re-infection and growth of HRVc15 virus in HAE cultures. Apical wash from HRVc15-infected HAE culture ( $5.4 \times 10^6$  copies RNA/well) was collected and used to infect fresh HAE cultures in the presence of 0.5% DMSO or 4uM rupintrivir and incubated at 33°C. At selected time points, virus shed into the HAE apical mucosa was collected and quantified by RT-qPCR. Error bars represent the standard deviation of the mean from triplicate tests.
